# Supplementary material
Source: PubMed Central journal article supplement (PMC6365865)
Supplement: rstb20180428supp1.pdf [file rstb20180428supp1.pdf]

## Supporting Information

### Life-history trade-offs and limitations associated with phenotypic adaptation under future ocean warming and elevated salinity

Michael D. Jarrold, Leela J. Chakravarti, Emma M. Gibbin, Felix Christen, Gloria Massamba-N'Siala, Pierre U. Blier, Piero Calosi

#### Enzyme assay methodology

##### *Determination of citrate synthase and electron transport system activities*

Citrate synthase and ETS activities were normalized to protein content. Measurements were taken using a UV/VIS microplate spectrophotometer (Perkin Elmer Envision, Foster City, CA, USA). Samples were homogenized in 120  $\mu\text{L}$  of ice-cold 100 mM phosphate buffer, 20 mM EDTA (pH 8.00). CS, ETS and protein content were quantified using the same homogenate. CS activity was measured in 0.1 mM 5,50-dithiobis (2-nitrobenzoic acid) (DTNB), 0.1 mM acetyl-CoA and 0.15 mM oxaloacetate (pH 8.00). CS activity was measured in triplicate at 27°C and was calculated from the increase in absorbance at 412 nm over 3 min ( $\epsilon_{412} = 13.6 \text{ mL cm}^{-1} \mu\text{mol}^{-1}$ ), caused by the reduction in DTNB (1). ETS activity was measured in 0.85 mM b-Nicotinamide adenine dinucleotide, reduced disodium salt hydrate, 2 mM Iodonitrotetrazolium chloride (INT) and 0.03% Triton<sup>TM</sup> X-100 (Sigma-Aldrich, Mississauga, ON, Canada) (pH 8). Activities were measured in triplicate at 27°C by following the increase in absorbance due to the reduction in INT at 490 nm for 4 min ( $\epsilon_{490} = 15.9 \text{ mL cm}^{-1} \mu\text{mol}^{-1}$ ) (2). Total protein content was determined on homogenates using the bicinchoninic acid method (3).

## References

1. Thibeault M, Blier PU, Gurderley H. 1997. Seasonal variation of muscle metabolic organization in rainbow trout (*Oncorhynchus mykiss*). *Fish Physiology and Biochemistry*. (1997); 16:139–155.
2. Bergmeyer HU. *Methods of enzymatic analysis*, deerfield beach. Verlag Chemie, Florida (1993).
3. Smith PK, Krohn RI, Hermanson GT, Mallia AK, Gartner FH, Provenzano MD, et al. Measurement of protein using bicinchoninic acid. *Analytical Biochemistry*. (1985) 1:76–85.
