# Supplementary material
Source: PubMed Central journal article supplement (PMC6365865)
Supplement: rstb20180428supp2.pdf [file rstb20180428supp2.pdf]

## Supporting Information

### Life-history trade-offs and limitations associated with phenotypic adaptation under future ocean warming and elevated salinity

Michael D. Jarrold, Leela J. Chakravarti, Emma M. Gibbin, Felix Christen, Gloria Massamba-N'Siala, Pierre U. Blier, Piero Calosi

**Table S1:** ANOVA outputs (marginal) from linear mixed effects models testing the effects of within-generation exposure to elevated temperature (T) and elevated temperature and salinity (TS) conditions on all traits measured in the marine polychaete *Ophryotrocha labronica* La Greca and Bacci (1962). df: degrees of freedom,  $F$ :  $F$ -ratio/  $\chi^2$ : chi-squared and  $P$ : probability level.  $P$  values in **bold** indicate statistically significant effects.

| Trait                 | Source      | df  | $F/\chi^2$ | $P$              |
|-----------------------|-------------|-----|------------|------------------|
| Juvenile survival     | Treatment   | 2   | 8.14       | <b>0.017</b>     |
|                       | Transplant  | 1   | 0.44       | 0.510            |
|                       | Interaction | 2   | 3.10       | 0.212            |
|                       |             | 61  |            |                  |
| Juvenile growth rates | Treatment   | 2   | 46.42      | <b>&lt;0.001</b> |
|                       | Transplant  | 1   | 2.06       | 0.152            |
|                       | Interaction | 2   | 3.41       | <b>0.034</b>     |
|                       |             | 341 |            |                  |
| Maximum body size     | Treatment   | 2   | 4.98       | <b>0.010</b>     |
|                       | Transplant  | 1   | 7.09       | <b>0.010</b>     |
|                       | Interaction | 2   | 4.80       | <b>0.012</b>     |
|                       |             | 61  |            |                  |
| Fecundity             | Treatment   | 2   | 21.45      | <b>&lt;0.001</b> |
|                       | Transplant  | 1   | 2.05       | 0.158            |
|                       | Interaction | 2   | 1.87       | 0.163            |
|                       |             | 61  |            |                  |
| Egg volume            | Treatment   | 2   | 6.91       | <b>0.001</b>     |
|                       | Transplant  | 1   | 0.00       | 0.976            |
|                       | Interaction | 2   | 0.14       | 0.866            |
|                       |             | 671 |            |                  |
| Longevity             | Treatment   | 2   | 2.92       | 0.062            |
|                       | Transplant  | 1   | 2.39       | 0.128            |
|                       | Interaction | 2   | 7.66       | <b>0.001</b>     |
|                       |             | 61  |            |                  |
| CS activity           | Treatment   | 2   | 3.16       | 0.052            |
|                       | Transplant  | 1   | 0.97       | 0.329            |
|                       | Interaction | 1   | 3.93       | <b>0.026</b>     |
|                       |             | 45  |            |                  |
| ETS activity          | Treatment   | 2   | 2.06       | 0.138            |
|                       | Transplant  | 1   | 0.16       | 0.690            |
|                       | Interaction | 2   | 1.91       | 0.158            |
|                       |             | 54  |            |                  |

**Table S2:** ANOVA outputs (marginal) from linear mixed effects models testing the effects of within vs trans-generation exposure to T conditions on all traits measured in the marine polychaete *O. labronica*. df: degrees of freedom, *F*: *F*-ratio/  $\chi^2$ : chi-squared and *P*: probability level are given. *P* values in **bold** indicate significant effects.

| Trait                 | Source      | df  | <i>F</i> / $\chi^2$ | <i>P</i>         |
|-----------------------|-------------|-----|---------------------|------------------|
| Juvenile survival     | Treatment   | 2   | 5.18                | 0.075            |
|                       | Transplant  | 1   | 0.29                | 0.592            |
|                       | Interaction | 2   | 3.57                | 0.168            |
|                       |             | 63  |                     |                  |
| Juvenile growth rates | Treatment   | 2   | 7.16                | <b>&lt;0.001</b> |
|                       | Transplant  | 1   | 1.84                | 0.176            |
|                       | Interaction | 2   | 0.71                | 0.495            |
|                       |             | 351 |                     |                  |
| Maximum body size     | Treatment   | 2   | 10.53               | <b>&lt;0.001</b> |
|                       | Transplant  | 1   | 7.10                | <b>0.010</b>     |
|                       | Interaction | 2   | 1.08                | 0.346            |
|                       |             | 63  |                     |                  |
| Fecundity             | Treatment   | 2   | 8.34                | <b>&lt;0.001</b> |
|                       | Transplant  | 1   | 1.82                | 0.182            |
|                       | Interaction | 2   | 0.97                | 0.385            |
|                       |             | 63  |                     |                  |
| Egg volume            | Treatment   | 2   | 5.13                | <b>0.006</b>     |
|                       | Transplant  | 1   | 0.00                | 0.977            |
|                       | Interaction | 2   | 0.27                | 0.765            |
|                       |             | 691 |                     |                  |
| Longevity             | Treatment   | 2   | 6.19                | <b>0.004</b>     |
|                       | Transplant  | 1   | 2.05                | 0.158            |
|                       | Interaction | 2   | 2.83                | 0.067            |
|                       |             | 63  |                     |                  |
| CS activity           | Treatment   | 2   | 3.17                | 0.051            |
|                       | Transplant  | 1   | 0.84                | 0.364            |
|                       | Interaction | 2   | 0.68                | 0.513            |
|                       |             | 51  |                     |                  |
| ETS activity          | Treatment   | 2   | 0.92                | 0.404            |
|                       | Transplant  | 1   | 0.10                | 0.752            |
|                       | Interaction | 2   | 0.24                | 0.786            |
|                       |             | 57  |                     |                  |

**Table S3:** ANOVA outputs (marginal) from linear mixed effects models testing the effects of within vs trans-generation exposure to TS on all traits measured in the marine polychaete *O. labronica*. df: degrees of freedom, *F*: *F*-ratio/  $\chi^2$ : chi-squared and *P*: probability level are given. *P* values in **bold** indicate significant effects.

| Trait                 | Source      | df  | <i>F</i> / $\chi^2$ | <i>P</i>         |
|-----------------------|-------------|-----|---------------------|------------------|
| Juvenile survival     | Treatment   | 2   | 10.93               | <b>0.004</b>     |
|                       | Transplant  | 1   | 1.77                | 0.184            |
|                       | Interaction | 2   | 1.89                | 0.388            |
|                       |             | 60  |                     |                  |
| Juvenile growth rates | Treatment   | 2   | 29.11               | <b>&lt;0.001</b> |
|                       | Transplant  | 1   | 1.95                | 0.164            |
|                       | Interaction | 2   | 5.29                | <b>0.006</b>     |
|                       |             | 336 |                     |                  |
| Maximum body size     | Treatment   | 2   | 0.45                | 0.643            |
|                       | Transplant  | 1   | 7.48                | <b>0.008</b>     |
|                       | Interaction | 2   | 5.07                | <b>0.009</b>     |
|                       |             | 60  |                     |                  |
| Fecundity             | Treatment   | 2   | 18.50               | <b>&lt;0.001</b> |
|                       | Transplant  | 1   | 1.71                | 0.195            |
|                       | Interaction | 2   | 1.46                | 0.240            |
|                       |             | 60  |                     |                  |
| Egg volume            | Treatment   | 2   | 7.16                | <b>&lt;0.001</b> |
|                       | Transplant  | 1   | 0.00                | 0.977            |
|                       | Interaction | 2   | 2.64                | 0.072            |
|                       |             | 681 |                     |                  |
| Longevity             | Treatment   | 2   | 0.99                | 0.377            |
|                       | Transplant  | 1   | 1.98                | 0.165            |
|                       | Interaction | 2   | 5.24                | <b>0.008</b>     |
|                       |             | 60  |                     |                  |
| CS activity           | Treatment   | 2   | 1.70                | 0.195            |
|                       | Transplant  | 1   | 0.82                | 0.372            |
|                       | Interaction | 2   | 3.35                | <b>0.045</b>     |
|                       |             | 40  |                     |                  |
| ETS activity          | Treatment   | 2   | 1.71                | 0.191            |
|                       | Transplant  | 1   | 0.12                | 0.734            |
|                       | Interaction | 2   | 1.31                | 0.279            |
|                       |             | 53  |                     |                  |

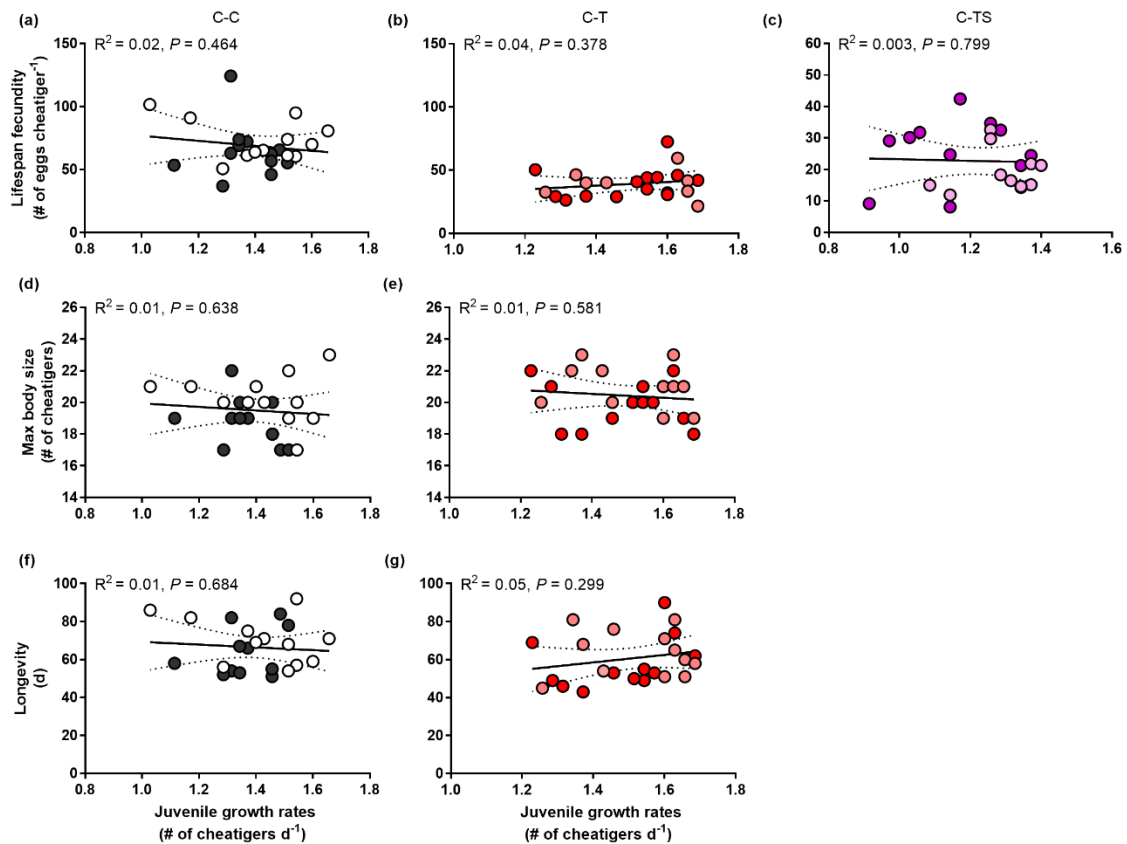

**Fig. S1.** Non-significant within-generation relationships between juvenile growth rates and adult life-history traits (lifespan fecundity (a,b,c), max body size (d,e) and longevity (f,g)) in the control-control (C-C), control-elevated temperature (C-T) and control-elevated temperature combined with elevated salinity (C-TS) treatments. Dark and light colours represent egg mass and juvenile transplants respectively. R<sup>2</sup> and P values are provided with significant relationships highlighted in **bold**.

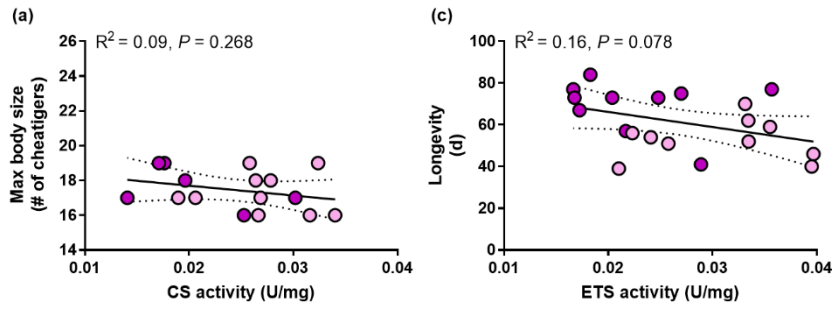

**Fig. S2.** Non-significant within-generation relationships between physiological and adult life-history traits in the C-TS treatment. (a) Citrate synthase (CS) activity vs. max body size and (b) ETS activity vs. longevity. Dark and light colours represent egg mass and juvenile transplants respectively.  $R^2$  and  $P$  values are provided.

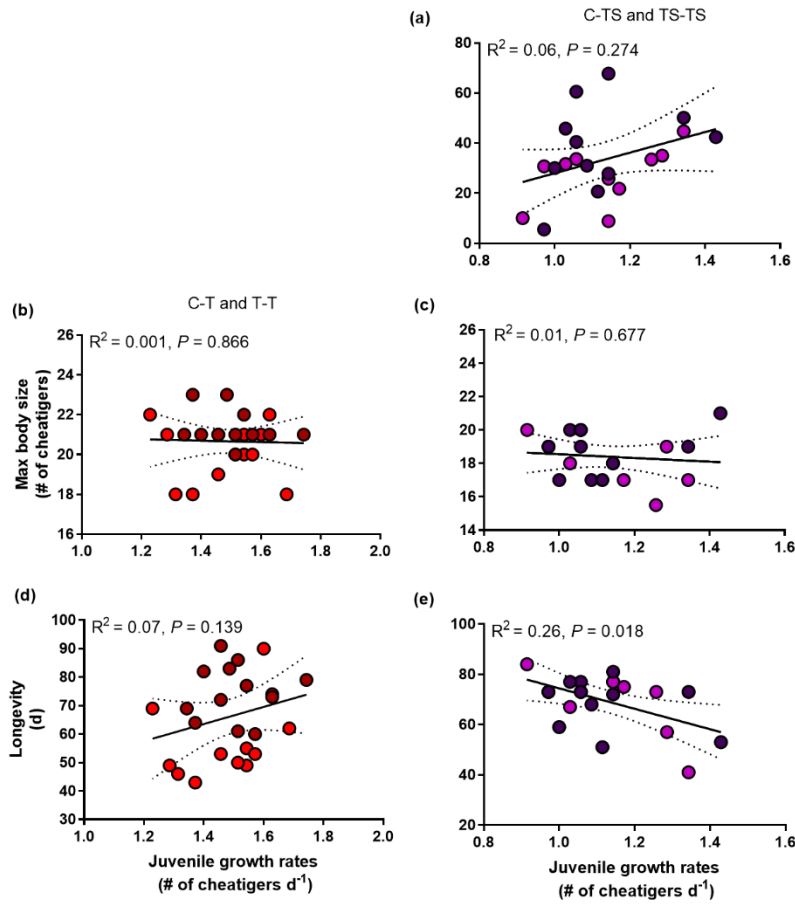

**Fig. S3.** Non-significant effects of trans-generation exposure on the relationships between juvenile growth rates and adult life-history traits under T and TS conditions. Juvenile growth rates vs. lifespan fecundity (a), juvenile growth rates vs. max body size (b, c) and juvenile growth rates vs. longevity (d, e). Light and dark colours represent egg mass transplants from the within- and trans-generation treatments respectively.  $R^2$  and  $P$  values are provided.

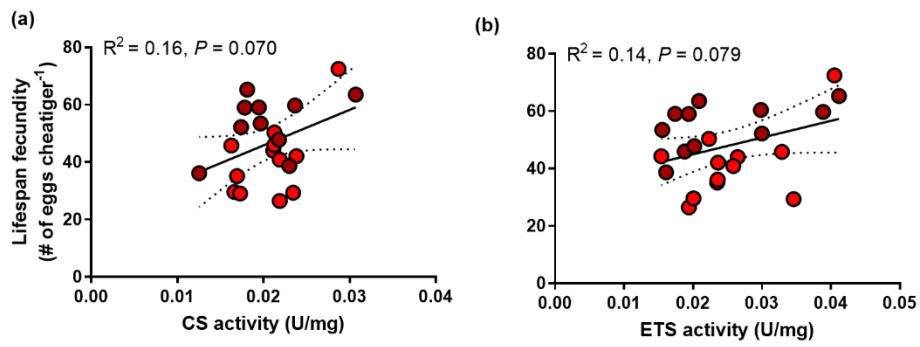

**Fig. S4.** Effects of trans-generation exposure on the relationships between physiological traits and lifespan fecundity under T conditions. CS activity vs. lifespan fecundity (a) and ETS activity vs. lifespan fecundity (b). Light and dark colours represent egg mass transplants from the within- and trans-generation treatments respectively.  $R^2$  and  $P$  values are provided.



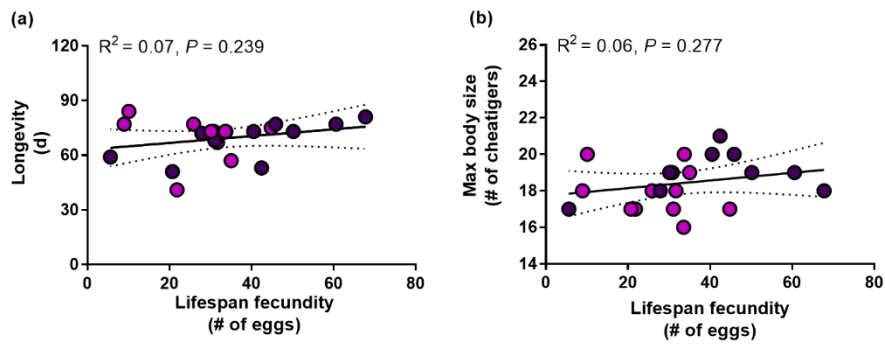

**Fig. S5.** Non-significant effects of trans-generation exposure to TS conditions on the relationships between adult life-history traits. Dark and light colours represent egg mass and juvenile transplants respectively.  $R^2$  and  $P$  values are provided.
